# Supplementary material
Source: publisher figshare collection journal article supplement (https://acs.figshare.com/ndownloader/files/4660813)
Supplement: Supplementary file 1 [file 4660813]

## Supporting Information

### Highly Swollen Layered Nickel Oxide with a Trilayer Hydrate Structure

Xiaojing Yang, Kazunori Takada, Masayuki Itose, Yasuo Ebina, Renzhi Ma, Katsutoshi Fukuda, and Takayoshi Sasaki\*

Nanoscale Materials Center, National Institute for Materials Science, Namiki 1-1, Tsukuba, Ibaraki 305-0044, Japan

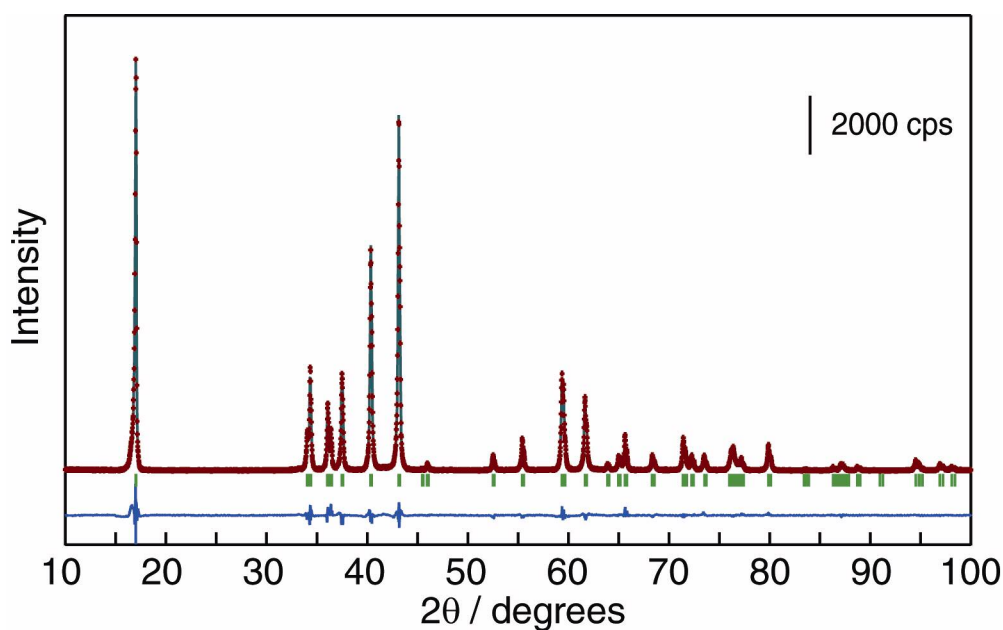

**Figure S1.** Rietveld refinement pattern for  $\text{NaNiO}_2$ . Observed (crosses), calculated (smooth line) and their difference (blue trace). The tick marks indicate the positions of allowed Bragg reflections.

**Table S1. Structure Parameters of  $\text{NaNiO}_2$**

| Atom | Wyckoff index | Occupancy | x         | y             | Z             | $U/\text{\AA}^2$ |
|------|---------------|-----------|-----------|---------------|---------------|------------------|
| Ni   | 2a            | 1         | 0         | 0             | 0             | 0.0099(4)        |
| O    | 4i            | 1         | 0.2829(4) | 0             | 0.8035(4)     | 0.0107(7)        |
| Na   | 2d            | 1         | 0         | $\frac{1}{2}$ | $\frac{1}{2}$ | 0.0165(7)        |

\*<sup>1</sup>Space group:  $C2/m$  (No. 12)

\*<sup>2</sup> $a = 5.3222(3) \text{ \AA}$ ,  $b = 2.8458(1) \text{ \AA}$ ,  $c = 5.5832(3) \text{ \AA}$ ,  $\beta = 110.474(3)^\circ$ ,  $V = 79.221(7) \text{ \AA}^3$ ;  $R_{wp} = 11.57\%$ ,  $R_p = 7.70\%$ ,  $R_B = 1.89\%$ ,  $R_F = 1.17\%$ ,  $R_R = 8.99\%$ ,  $S = 1.76$

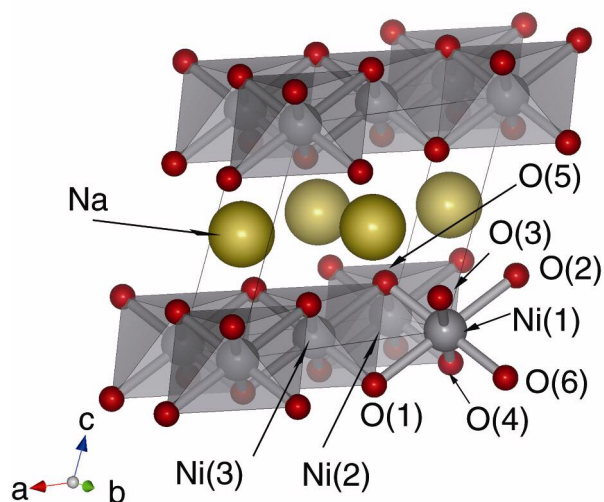

**Figure S2.** Crystal Structure for  $\text{NaNiO}_2$ . Selected interatomic distances (in Å): Ni(1)–O(1) and Ni(1)–O(2) 2.151(2); Ni(1)–O(3), Ni(1)–O(4), Ni(1)–O(5) and Ni(1)–O(6) 1.9176(9); Ni(1)–Ni(2) 2.84580(9); Ni(1)–Ni(3) 3.01763(13).

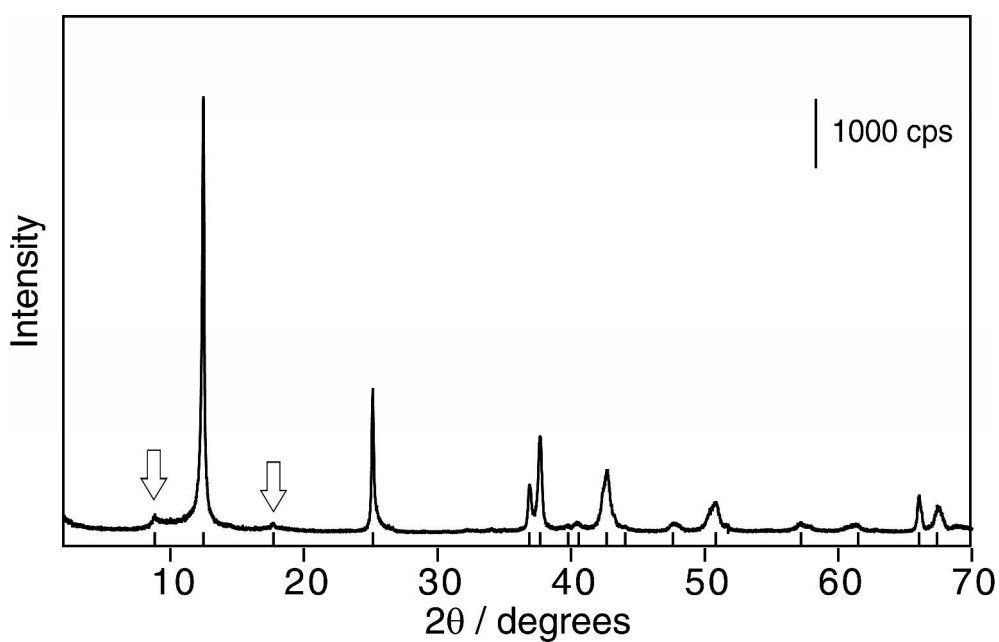

**Figure S3.** XRD data for a sample obtained after treating the  $\gamma$ -phase,  $\text{Na}_{0.33}\text{NiO}_2 \cdot 0.5\text{H}_2\text{O}$ , with pure water. The reflections indicated by an arrow indicate the formation of a 10 Å phase in a small amount. The other peaks remained unchanged during the treatment with water and are attributable to the original  $\gamma$ -phase structure.
